# Supplementary material for: Tea cultivation: facilitating soil organic carbon accumulation and altering soil bacterial community—Leishan County, Guizhou Province, Southwest China
Source: PeerJ. 2025 Jan 24;13:e18683. doi: 10.7717/peerj.18683 (PMC11771302; doi:10.7717/peerj.18683)
Supplement: Supplemental Information 1 [file peerj-13-18683-s001.xlsx]

## Sheet: Soil physiochemical
Number	Tea planting year	Soil layer depth	Soil pH	TN（g/kg）	SAN（mg/kg）	AP（mg/kg）	AK（mg/kg）
Y50	50	0-20cm	3.29	4.88557	385.7	44.43	259
Y50	50	20-40cm	3.53	2.82293	217.96	21.5	173
Y50	50	0-20cm	3.19	3.92797	292.56	56.32	171
Y50	50	20-40cm	3.64	1.92	149.27	21.12	70
Y50	50	0-20cm	3.27	4.48319	324.59	65.26	158
Y50	50	20-40cm	3.78	2.10905	167.78	21.69	93
Y40	40	0-20cm	3.3	4.14272	289.81	77.15	338
Y40	40	20-40cm	3.7	1.99913	144.14	26.92	249
Y40	40	0-20cm	3.94	4.95442	355.98	75.44	444
Y40	40	20-40cm	4.28	2.20959	170.16	38.15	234
Y40	40	0-20cm	3.75	6.03397	400.84	55.65	452
Y40	40	20-40cm	4.4	2.24413	204.37	25.78	296
Y20	20	0-20cm	4.19	4.70125	269.81	31.96	126
Y20	20	20-40cm	4.46	2.97	109.65	15.89	72.5
Y20	20	0-20cm	4.24	2.79204	213.14	21.69	135
Y20	20	20-40cm	4.3	1.95911	129.36	6.47	62
Y20	20	0-20cm	3.9	2.37975	186.03	19.22	113
Y20	20	20-40cm	4.52	2.21955	188.5	12.18	72
Y15	15	0-20cm	4.35	2.9292	220.53	8.94	100
Y15	15	20-40cm	4.41	1.69059	132.85	0.8	31
Y15	15	0-20cm	4.24	2.86701	215.6	5.52	115
Y15	15	20-40cm	4.48	1.73912	117.04	1.1	27
Y15	15	0-20cm	4.2	3.08753	245.17	7.04	67
Y15	15	20-40cm	4.53	2.58503	109.73	1.71	55
Y5	5	0-20cm	4.7	2.7648	150.3	3.61	70
Y5	5	20-40cm	4.66	0.527196	68.51	0.76	20
Y5	5	0-20cm	4.34	1.85926	147.84	4.19	56
Y5	5	20-40cm	4.38	0.646682	58.05	1.52	48
Y5	5	0-20cm	4.45	2.8198	221.76	3.81	112
Y5	5	20-40cm	4.46	0.93	73.92	1.71	58
Y0	0	0-20cm	4.57	1.70194	124.43	1.39	77
Y0	0	20-40cm	4.64	1.11627	61.6	0.34	69
Y0	0	0-20cm	4.57	1.51969	107.18	0.527035	74
Y0	0	20-40cm	4.6	0.915709	56.67	0.143015	76
Y0	0	0-20cm	4.59	1.74284	165.09	1.48709	77
Y0	0	20-40cm	4.66	0.69	54.21	0.527035	21

## Sheet: SOC and carbon fractions
Number	Tea planting year	Soil layer depth	SOC（g/kg）	EOC(g/kg)	POC (g/kg)	DOC（ mg/kg）	MBC（ mg/kg）
Y50	50	0-20cm	71.9919	14.234	50.394	168.8	105.26
Y50	50	20-40cm	41.4278	9.173	31.406	181.2	90.92
Y50	50	0-20cm	41.9534	8.992	30.675	211.8	121.21
Y50	50	20-40cm	17.16	2.346	11.186	137.1	58.9
Y50	50	0-20cm	56.5107	15.695	32.513	203.2	120.71
Y50	50	20-40cm	23.4861	4.787	14.86	146.4	57.73
Y40	40	0-20cm	44.0279	8.079	32.556	217.1	31.72
Y40	40	20-40cm	18.9374	3.122	10.329	172.8	26.89
Y40	40	0-20cm	59.7685	13.066	41.838	189.6	26.48
Y40	40	20-40cm	20.4864	3.251	12.851	172.4	34.71
Y40	40	0-20cm	78.921	13.904	55.245	236.8	35.63
Y40	40	20-40cm	30.3455	5.436	22.759	197.6	44.06
Y20	20	0-20cm	56.3282	8.645	33.114	166.7	80.39
Y20	20	20-40cm	35.37	4.243	24.253	140.7	65.82
Y20	20	0-20cm	37.4748	7.442	23.987	184.3	57.44
Y20	20	20-40cm	15.498	2.303	4.088	101	39.03
Y20	20	0-20cm	32.1636	5.288	24.148	140.1	77.73
Y20	20	20-40cm	26.4228	4.776	15.811	117.8	70.94
Y15	15	0-20cm	34.0731	7.252	22.36	152.4	131.53
Y15	15	20-40cm	11.9943	1.603	4.777	87.72	105.35
Y15	15	0-20cm	29.6063	4.97	16.139	169.8	93.23
Y15	15	20-40cm	15.0666	4.425	6.04	90.79	96.52
Y15	15	0-20cm	36.0474	6.775	21.574	145.2	84.15
Y15	15	20-40cm	24.3045	3.765	11.266	129	89.91
Y5	5	0-20cm	20.2759	4.836	11.238	105.23	79.76
Y5	5	20-40cm	4.29814	0.929	0.874	39.87	110.16
Y5	5	0-20cm	23.0189	4.977	9.005	129.7	48.93
Y5	5	20-40cm	5.24966	1.742	2.011	51.28	138.22
Y5	5	0-20cm	26.8026	7.04	15.177	135.5	56.63
Y5	5	20-40cm	8.18	1.898	1.542	81.7	92.79
Y0	0	0-20cm	15.908	3.12	4.109	175.9	112.93
Y0	0	20-40cm	7.48335	1.79	1.794	99.1	32.04
Y0	0	0-20cm	12.5947	2.612	5.724	168.2	83.02
Y0	0	20-40cm	6.05494	1.221	1.133	72.18	37.67
Y0	0	0-20cm	23.2872	5.645	14.432	192	56.25
Y0	0	20-40cm	6	1.397	1.301	75.9	36.21

## Sheet: Soil bacteria community
Number	Tea planting year	soil layer depth	Chao1	ACE	Shannon	Simpson
Y50	50	0-20cm	2721.37	2825.19	6.07862	0.992872
Y50	50	0-20cm	3006.94	3152.08	6.44783	0.995996
Y50	50	0-20cm	1703.45	1816.95	4.77861	0.962944
Y40	40	0-20cm	1760.09	1887.05	5.15066	0.976611
Y40	40	0-20cm	2078.32	2222.49	5.65558	0.988629
Y40	40	0-20cm	1953.19	2094.5	5.13357	0.969062
Y20	20	0-20cm	2819.87	2905.54	6.53424	0.995257
Y20	20	0-20cm	3003.1	3151.66	6.57204	0.99594
Y20	20	0-20cm	2986.67	3098.53	6.45583	0.995916
Y15	15	0-20cm	3034.18	3152.49	6.65005	0.996053
Y15	15	0-20cm	3298.33	3408.17	6.83607	0.997304
Y15	15	0-20cm	2901.02	2904.99	6.5931	0.997232
Y5	5	0-20cm	2854.64	2916.42	6.57028	0.996324
Y5	5	0-20cm	2825.28	2857.9	6.52444	0.996516
Y5	5	0-20cm	3160.72	3217.07	6.62697	0.996703
Y0	0	0-20cm	2880.62	2938.38	6.52894	0.995697
Y0	0	0-20cm	2788.14	2920.68	6.35315	0.995141
Y0	0	0-20cm	2913.72	2977.53	6.26136	0.99459

## Sheet: community composition
Number	Tea planting year	soil layer depth	Acidobacteriota	Chloroflexi	Proteobacteria	Actinobacteriota	Bacteroidota	Verrucomicrobiota	WPS-2	Firmicutes	RCP2-54	Gemmatimonadota	other
Y50	50	0-20cm	0.248748	0.105625	0.378293	0.0913583	0.0394293	0.00134158	0.0563136	0.0353719	0.0009162	0.000785315	0.041818
Y50	50	0-20cm	0.309839	0.40447	0.0905402	0.0556919	0.0119433	0.010569	0.0481332	0.0082458	0.00317398	0.00418834	0.053205
Y50	50	0-20cm	0.232519	0.428684	0.135172	0.0556919	0.0059553	0.00634796	0.026668	0.00461372	0.00788587	0.00948922	0.086974
Y40	40	0-20cm	0.315402	0.118321	0.245182	0.0699257	0.0178005	0.00484277	0.0120088	0.0145938	0.00225778	0.00068715	0.198979
Y40	40	0-20cm	0.0748339	0.415922	0.169693	0.0821963	0.0124669	0.00140702	0.00795131	0.00896568	0.00759137	0.00117797	0.217794
Y40	40	0-20cm	0.26272	0.123785	0.319132	0.0956775	0.0192075	0.00114525	0.0192729	0.0338994	0.00507182	0.0004581	0.11963
Y20	20	0-20cm	0.329832	0.254671	0.233075	0.057328	0.0036648	0.0225124	0.0221524	0.000654429	0.0116488	0.018324	0.046137
Y20	20	0-20cm	0.22833	0.22244	0.161317	0.0558882	0.162331	0.0229377	0.0112235	0.0702857	0.0059553	0.0108962	0.048395
Y20	20	0-20cm	0.2014	0.174013	0.17326	0.0575897	0.205916	0.0263408	0.0157063	0.0721835	0.00516999	0.0105036	0.057917
Y15	15	0-20cm	0.227545	0.171002	0.344622	0.109388	0.0179641	0.0164916	0.0110598	0.00193057	0.0276823	0.0176696	0.054645
Y15	15	0-20cm	0.205752	0.321554	0.235922	0.106705	0.00523543	0.0305618	0.0361572	0.00134158	0.00755865	0.0118124	0.037401
Y15	15	0-20cm	0.24636	0.260299	0.255391	0.0955139	0.0127941	0.0200582	0.021498	0.00294493	0.00978371	0.016328	0.059029
Y5	5	0-20cm	0.43333	0.212428	0.127646	0.0338994	0.0106345	0.0454501	0.0129904	0.00516999	0.0112562	0.0129904	0.094205
Y5	5	0-20cm	0.333301	0.342953	0.119466	0.0601747	0.00909656	0.0421452	0.0358627	0.00255227	0.00592258	0.0054972	0.043029
Y5	5	0-20cm	0.303982	0.297307	0.190831	0.065901	0.00952194	0.0287294	0.0212035	0.00382841	0.0119106	0.0154772	0.051307
Y0	0	0-20cm	0.448087	0.160171	0.117994	0.0313799	0.0102418	0.126468	0.00811492	0.00124341	0.016557	0.00893295	0.070809
Y0	0	0-20cm	0.311181	0.217467	0.22676	0.0339649	0.00975099	0.0167534	0.00461372	0.000294493	0.0220543	0.0299074	0.127254
Y0	0	0-20cm	0.383234	0.125912	0.263768	0.0457773	0.0152482	0.0471189	0.0126959	0.0013743	0.0296129	0.0121397	0.06312

## Sheet: Functional prediction
Number	Tea planting year	soil layer depth	nitrogen_fixation	cellulolysis	fermentation	aerobic_chemoheterotrophy	human_pathogens_pneumonia	human_pathogens_all	human_associated	animal_parasites_or_symbionts	chloroplasts	chemoheterotrophy	other
Y50	50	0-20cm	0.0372	0.0745	0.0188	0.3574	0.0073	0.0078	0.0078	0.0138	0.006	0.3748	0.0946
Y50	50	0-20cm	0.0364	0.0986	0.0144	0.3224	0.0137	0.0148	0.0153	0.0352	0.0588	0.3363	0.0541
Y50	50	0-20cm	0.0625	0.1051	0.01	0.3066	0.018	0.0204	0.0204	0.0486	0.0278	0.3143	0.0663
Y40	40	0-20cm	0.0247	0.1896	0.0157	0.3044	0.0155	0.017	0.0173	0.0472	0.0043	0.3213	0.043
Y40	40	0-20cm	0.0227	0.2337	0.0147	0.3237	0.005	0.0061	0.0061	0.0104	0.0018	0.3386	0.0372
Y40	40	0-20cm	0.0311	0.142	0.0167	0.3337	0.0024	0.0125	0.0126	0.018	0.0031	0.3514	0.0765
Y20	20	0-20cm	0.093	0.102	0.0023	0.2754	0.0417	0.0428	0.0428	0.0611	0.0016	0.2764	0.0609
Y20	20	0-20cm	0.0487	0.0637	0.0853	0.1798	0.0245	0.0252	0.0255	0.1344	0.0018	0.2606	0.1505
Y20	20	0-20cm	0.048	0.075	0.1013	0.1977	0.015	0.0158	0.0163	0.1255	0.0492	0.3018	0.0544
Y15	15	0-20cm	0.069	0.0994	0.0038	0.258	0.0599	0.0614	0.0614	0.0719	0.0002	0.2603	0.0547
Y15	15	0-20cm	0.0696	0.1141	0.0033	0.2996	0.0282	0.0283	0.0283	0.0554	0.0055	0.3009	0.0668
Y15	15	0-20cm	0.0551	0.0906	0.0023	0.3083	0.0374	0.0388	0.0388	0.0574	0.0129	0.3091	0.0493
Y5	5	0-20cm	0.0518	0.0819	0.0074	0.2573	0.0476	0.0486	0.0486	0.0981	0.0043	0.2653	0.0891
Y5	5	0-20cm	0.0596	0.1055	0.0019	0.3094	0.0204	0.0227	0.0227	0.0991	0.0061	0.3109	0.0417
Y5	5	0-20cm	0.0881	0.0921	0.0038	0.2744	0.0362	0.0382	0.0382	0.0792	0.0076	0.278	0.0642
Y0	0	0-20cm	0.0535	0.1032	0.0059	0.2404	0.0355	0.0375	0.0375	0.1407	0.0009	0.2442	0.1007
Y0	0	0-20cm	0.0611	0.0564	0.0103	0.1949	0.0986	0.0992	0.0992	0.1118	0.0015	0.2033	0.0637
Y0	0	0-20cm	0.0455	0.0994	0.0032	0.2248	0.0725	0.0734	0.0734	0.1282	0.0028	0.2276	0.0492
